# Supplementary material
Source: HighWire-hosted journal article supplement (https://bmjopen.bmj.com/content/8/9/e023599)
Supplement: inline-supplementary-material-1 [file inline-supplementary-material-1.pdf]

## Supplementary material

Table 1. Description of the accuracy of coding for stroke in France (3 validation studies)

|                                    | <b>Giroud <i>et al.</i><sup>11</sup></b>               | <b>Haesebaert <i>et al.</i><sup>37</sup></b>                | <b>Aboa-Eboulé <i>et al.</i><sup>36</sup></b> |
|------------------------------------|--------------------------------------------------------|-------------------------------------------------------------|-----------------------------------------------|
| <b>Study area</b>                  | National (31 French hospitals)                         | Local: Rhône                                                | Local: city of Dijon                          |
| <b>Study period</b>                | 2009-2010                                              | 2006-2007                                                   | 2004-2008                                     |
| <b>Hospital discharge database</b> | 1669 stroke cases                                      | 329 ischemic strokes                                        | 903 stroke cases                              |
| <b>Reference stroke population</b> | Ascertainment of stroke cases by the neurological team | Cohort of acute ischemic stroke patients (AVC69): 465 cases | Dijon stroke registry: 811 cases              |
| <b>Intracerebral hemorrhage</b>    |                                                        |                                                             |                                               |
| <b>True-positives*, n</b>          | 168                                                    | -                                                           | 94                                            |
| <b>False-positives*, n</b>         | 20                                                     | -                                                           | 45                                            |
| <b>PPV, %</b>                      | <b>89.4</b>                                            | -                                                           | <b>67.6**</b>                                 |
| <b>Ischemic stroke</b>             |                                                        |                                                             |                                               |
| <b>True-positives, n</b>           | 880                                                    | 313                                                         | 411                                           |
| <b>False-positives, n</b>          | 34                                                     | 16                                                          | 176                                           |
| <b>PPV, %</b>                      | <b>96.3</b>                                            | 95.1                                                        | <b>70.0**</b>                                 |
| <b>Undetermined stroke</b>         |                                                        |                                                             |                                               |
| <b>True-positives, n</b>           | 41                                                     | -                                                           | 0                                             |
| <b>False-positives, n</b>          | 6                                                      | -                                                           | 45                                            |
| <b>PPV, %</b>                      | <b>87.2</b>                                            | -                                                           | -                                             |

\*True-positives = stroke cases identified in reference stroke population and in the hospital discharge database

False-positives = stroke cases identified in the hospital discharge database but not in the reference stroke population

\*\*Calculated with data in the results

PPV: Positive predictive value

The 3 studies used the same algorithm for stroke cases detection: stroke codes according to ICD-10 in principal diagnosis. Considering the most recent study periods, Giroud *et al.* and Haesebaert *et al.* showed a high PPV for ischemic stroke, and especially according to Giroud *et al.* for intracerebral hemorrhage and undetermined stroke.
